# Supplementary material for: Sustained NF-κB-STAT3 signaling promotes resistance to Smac mimetics in Glioma stem-like cells but creates a vulnerability to EZH2 inhibition
Source: PubMed Central journal article supplement (PMC6399311; doi:10.1038/s41420-019-0155-9), 2019-03-04
Supplement: 41420_2019_155_MOESM1_ESM.pdf [file 41420_2019_155_MOESM1_ESM.pdf]

**Figure S1:** **A.** MGG8 stably expressing dual NF- $\kappa$ B reporter (where Gluc is under the control of NF- $\kappa$ B response elements and Vluc under SV40 promoter as an internal control) were pretreated with TPCA for 1h followed by BIR (2  $\mu$ M). NF- $\kappa$ B activity was measured after 24 and 48h of treatment by analyzing Gluc/Vluc levels. **B.** MGG8 were dissociated, counted and plated in the presence of conditioned medium collected from control or BIR-treated GSCs. Spheres were counted 7 days post-treatment. **C.** 157 GSCs expressing the NF- $\kappa$ B reporter were stably transduced with shSCR (control), shTNF $\alpha$  or shIL-6 and treated with BIR or LCL-161 (10  $\mu$ M). NF- $\kappa$ B activity was analyzed 48h later. ns: not significant; \* $p$ <0.05; \*\* $p$ <0.001; Student t-test.

**Figure S2:** **A.** MGG8 GSCs were co-treated with the indicated doses of LCL-161 in the presence or absence of DEAB (100  $\mu$ M) and cell viability was measured two days later. \*\*  $p$ <0.001; Student t-test.

**Figure S3:** **A.** MGG8 GSCs expressing the NF- $\kappa$ B reporter were treated with TNF $\alpha$  (10 ng/ml) and NF- $\kappa$ B activation was analyzed after 24h. **B.** Relative mRNA expression of STAT3 and NF- $\kappa$ B transcriptional targets in GSCs treated with TNF $\alpha$ . \* $p$ <0.05; \*\* $p$ <0.001; Student t-test.

**Figure S4:** **A.** mRNA expression of cIAP2 in PC3 prostate cancer cells treated with BIR (10  $\mu$ M) for 24h. **B.** MGG23 GSCs were transduced with shSCR or shcIAP2 and subsequently treated with LCL-161 at the indicated doses. Cell viability was measured three days after treatment. \* $p$ <0.05; \*\* $p$ <0.001; Student t-test.

**Figure S5:** **A.** Western blot analysis of pY-STAT3 and cIAP2 in 83 GSCs treated with BIR (10

$\mu\text{M}$ ) and/or AZD1480 (2  $\mu\text{M}$ ). **B.** NF- $\kappa\text{B}$  activity following treatment of MGG8 GSCs expressing dual reporter with BIR and AZD1480. **C.** Cell viability in MGG8 GSCs treated with BIR or LCL-161 with the indicated concentrations of AZD1480 for four days. **D.** Western blot analysis of pEZH2 (S21) in MGG8 GSCs following treatment with BIR (20  $\mu\text{M}$ ) for 0, 48 and 72h **E.** Western blot analysis of EZH2 and H3K27me after treatment with BIR (10  $\mu\text{M}$ ) at different time points. ns: not significant; \*  $p < 0.05$ ; \*\*  $p < 0.001$ ; Student t-test.
